# Supplementary material
Source: PubMed Central journal article supplement (PMC2869105)
Supplement: datasupp.pdf [file datasupp.pdf]

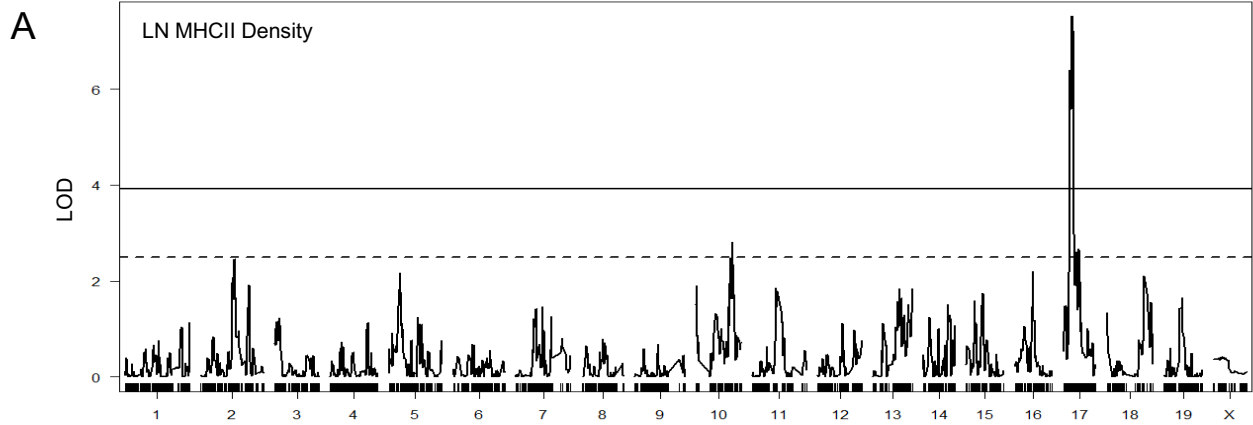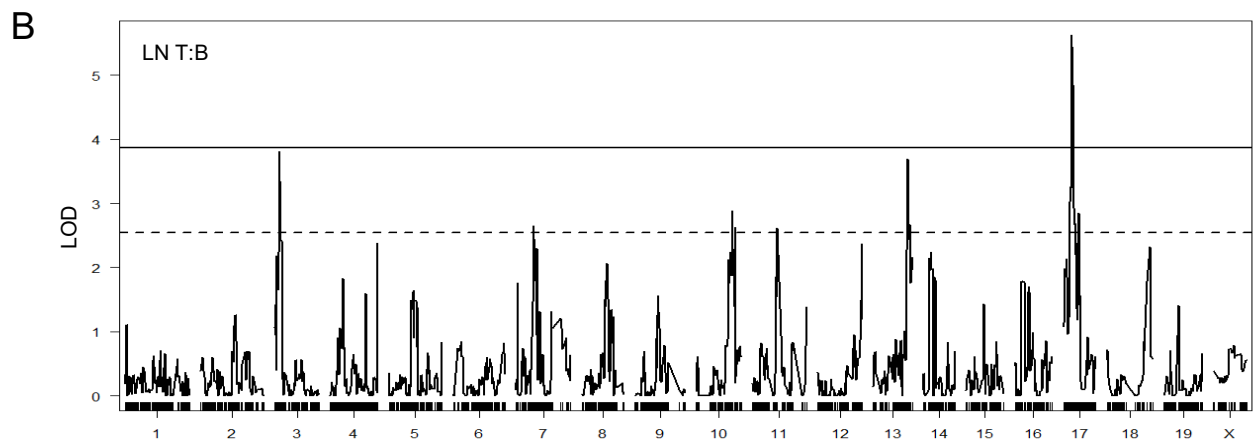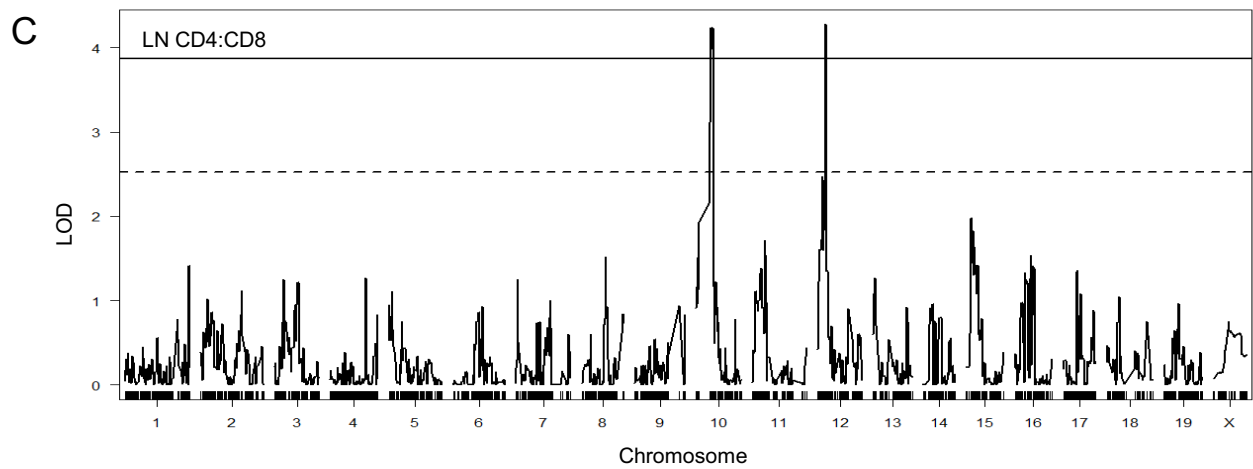

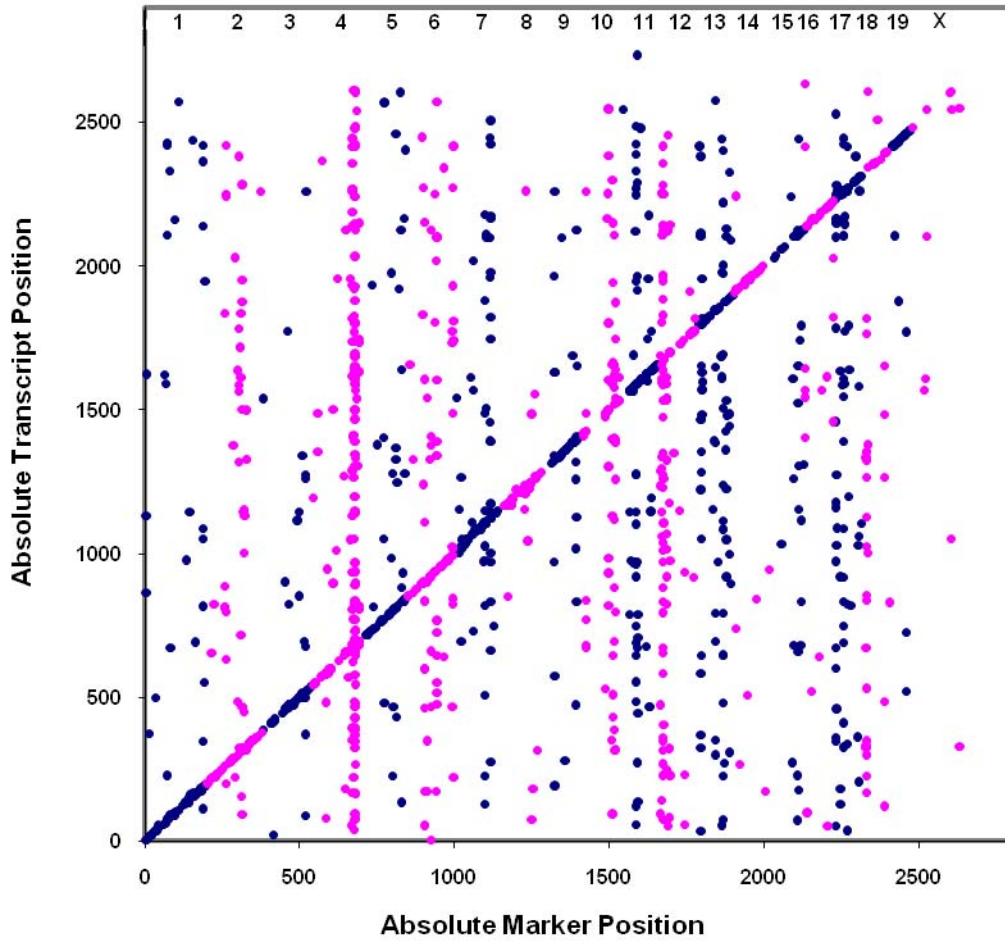

Supplemental Table 1 - Strain effects on peripheral blood lymphocyte immunophenotypes.

| STRAIN | %CD3       | %CD79      | LN T:B       | %CD4       | %CD8       | LN CD4:CD8  | LN MHCII Density |
|--------|------------|------------|--------------|------------|------------|-------------|------------------|
| BXD6   | 56.1 ± 3.4 | 36.3 ± 3.1 | 0.44 ± 0.15  | 30.5 ± 3.2 | 26.4 ± 3.4 | 0.16 ± 0.14 | 3.86 ± 0.09      |
| BXD11  | 40.8 ± 5.1 | 52.7 ± 5.4 | -0.28 ± 0.24 | 22.7 ± 2.9 | 18.0 ± 2.8 | 0.26 ± 0.15 | 3.94 ± 0.10      |
| BXD12  | 29.9 ± 4.5 | 62.2 ± 5.0 | -0.79 ± 0.23 | 19.3 ± 4.1 | 11.7 ± 1.5 | 0.44 ± 0.14 | 3.71 ± 0.24      |
| BXD13  | 21.4 ± 3.9 | 68.1 ± 4.6 | -1.25 ± 0.24 | 9.7 ± 0.7  | 8.8 ± 1.5  | 0.16 ± 0.14 | 3.28 ± 0.07      |
| BXD14  | 14.3 ± 1.5 | 75.9 ± 1.5 | -1.71 ± 0.13 | 10.7 ± 1.6 | 4.4 ± 0.5  | 0.85 ± 0.17 | 3.12 ± 0.06      |
| BXD16  | 46.2 ± 4.6 | 47.9 ± 4.9 | -0.04 ± 0.21 | 23.3 ± 1.2 | 19.6 ± 2.5 | 0.20 ± 0.10 | 4.01 ± 0.09      |
| BXD18  | 40.8 ± 5.4 | 48.4 ± 6.0 | -0.17 ± 0.26 | 22.2 ± 2.6 | 17.3 ± 1.9 | 0.26 ± 0.11 | 3.75 ± 0.16      |
| BXD19  | 22.7 ± 1.1 | 70.4 ± 1.5 | -1.16 ± 0.06 | 13.5 ± 1.4 | 8.9 ± 0.8  | 0.41 ± 0.17 | 3.42 ± 0.07      |
| BXD21  | 27.8 ± 2.3 | 63.7 ± 3.7 | -0.84 ± 0.12 | 17.3 ± 2.1 | 10.7 ± 1.7 | 0.53 ± 0.17 | 3.75 ± 0.11      |
| BXD24  | 49.0 ± 4.1 | 45.4 ± 3.5 | 0.08 ± 0.16  | 33.9 ± 3.7 | 19.4 ± 2.3 | 0.56 ± 0.18 | 4.15 ± 0.21      |
| BXD27  | 31.8 ± 6.2 | 64.5 ± 6.5 | -0.83 ± 0.36 | 19.2 ± 4.0 | 13.3 ± 2.7 | 0.33 ± 0.17 | 3.54 ± 0.06      |
| BXD28  | 37.3 ± 5.3 | 54.1 ± 5.4 | -0.30 ± 0.23 | 25.7 ± 6.4 | 10.8 ± 1.8 | 0.79 ± 0.21 | 3.76 ± 0.15      |
| BXD29  | 24.3 ± 2.4 | 70.0 ± 2.2 | -1.08 ± 0.12 | 12.8 ± 1.2 | 11.3 ± 1.0 | 0.12 ± 0.11 | 3.39 ± 0.07      |
| BXD31  | 25.4 ± 4.4 | 67.6 ± 5.0 | -1.02 ± 0.24 | 13.0 ± 3.0 | 7.8 ± 1.7  | 0.50 ± 0.08 | 3.61 ± 0.08      |
| BXD32  | 33.7 ± 2.5 | 55.8 ± 4.2 | -0.50 ± 0.15 | 20.1 ± 2.2 | 12.3 ± 1.9 | 0.53 ± 0.09 | 3.95 ± 0.04      |

|       |            |            |              |            |            |             |             |
|-------|------------|------------|--------------|------------|------------|-------------|-------------|
| BXD33 | 47.6 ± 5.5 | 43.9 ± 5.3 | 0.08 ± 0.25  | 35.6 ± 4.4 | 13.2 ± 1.0 | 0.95 ± 0.12 | 3.53 ± 0.15 |
| BXD34 | 27.2 ± 2.0 | 64.4 ± 1.8 | -0.88 ± 0.10 | 18.2 ± 1.6 | 9.6 ± 1.0  | 0.65 ± 0.16 | 3.82 ± 0.11 |
| BXD36 | 34.0 ± 2.0 | 62.5 ± 2.1 | -0.62 ± 0.10 | 22.6 ± 1.7 | 11.8 ± 1.4 | 0.67 ± 0.19 | 4.06 ± 0.12 |
| BXD38 | 37.2 ± 3.0 | 56.6 ± 1.9 | -0.44 ± 0.12 | 22.8 ± 1.9 | 15.8 ± 1.3 | 0.36 ± 0.09 | 3.73 ± 0.09 |
| BXD39 | 24.0 ± 2.1 | 62.6 ± 3.3 | -0.98 ± 0.10 | 15.7 ± 2.4 | 9.6 ± 1.6  | 0.50 ± 0.23 | 3.43 ± 0.10 |
| BXD40 | 42.8 ± 4.3 | 46.6 ± 3.8 | -0.10 ± 0.15 | 29.4 ± 3.8 | 15.8 ± 1.1 | 0.59 ± 0.10 | 3.97 ± 0.13 |
| BXD42 | 33.2 ± 2.1 | 60.7 ± 3.2 | -0.61 ± 0.12 | 23.0 ± 1.5 | 12.5 ± 2.4 | 0.73 ± 0.17 | 3.68 ± 0.12 |
| BXD43 | 22.4 ± 1.3 | 72.8 ± 1.0 | -1.19 ± 0.07 | 13.1 ± 1.0 | 4.6 ± 0.4  | 1.11 ± 0.11 | 3.62 ± 0.09 |
| BXD44 | 37.1 ± 3.2 | 53.8 ± 3.1 | -0.39 ± 0.14 | 25.0 ± 2.5 | 8.4 ± 1.5  | 1.15 ± 0.09 | 3.45 ± 0.16 |
| BXD45 | 24.5 ± 2.0 | 68.1 ± 1.6 | -1.04 ± 0.11 | 13.0 ± 1.8 | 10.3 ± 0.9 | 0.20 ± 0.11 | 3.19 ± 0.11 |
| BXD48 | 26.7 ± 4.2 | 65.5 ± 5.2 | -0.93 ± 0.21 | 19.4 ± 3.3 | 10.2 ± 2.1 | 0.71 ± 0.22 | 3.45 ± 0.09 |
| BXD50 | 27.0 ± 0.8 | 65.8 ± 3.1 | -0.89 ± 0.06 | 15.6 ± 1.3 | 9.8 ± 0.7  | 0.48 ± 0.08 | 3.79 ± 0.06 |
| BXD51 | 33.1 ± 4.4 | 60.6 ± 4.6 | -0.66 ± 0.22 | 22.9 ± 3.6 | 9.3 ± 1.0  | 0.84 ± 0.14 | 3.42 ± 0.13 |
| BXD55 | 23.8 ± 3.1 | 67.3 ± 2.2 | -1.07 ± 0.14 | 14.4 ± 1.5 | 7.1 ± 1.2  | 0.76 ± 0.19 | 3.43 ± 0.08 |
| BXD60 | 25.6 ± 3.0 | 66.2 ± 2.3 | -0.98 ± 0.16 | 16.2 ± 2.7 | 7.2 ± 0.8  | 0.78 ± 0.22 | 3.17 ± 0.10 |
| BXD61 | 30.5 ± 7.5 | 61.7 ± 6.9 | -0.80 ± 0.36 | 19.9 ± 6.7 | 9.6 ± 0.9  | 0.50 ± 0.31 | 3.13 ± 0.21 |
| BXD62 | 54.9 ± 4.2 | 38.3 ± 3.2 | 0.36 ± 0.16  | 29.5 ± 3.3 | 24.1 ± 2.1 | 0.19 ± 0.06 | 4.03 ± 0.09 |

|          |            |            |              |            |            |             |             |
|----------|------------|------------|--------------|------------|------------|-------------|-------------|
| BXD65    | 24.1 ± 2.0 | 64.8 ± 2.7 | -1.00 ± 0.12 | 13.4 ± 1.3 | 10.2 ± 1.6 | 0.30 ± 0.11 | 3.02 ± 0.08 |
| BXD66    | 36.0 ± 1.7 | 56.1 ± 1.3 | -0.45 ± 0.06 | 23.2 ± 1.9 | 15.6 ± 1.8 | 0.41 ± 0.16 | 3.76 ± 0.14 |
| BXD68    | 34.1 ± 5.8 | 50.3 ± 5.8 | -0.42 ± 0.25 | 18.3 ± 3.1 | 17.6 ± 1.8 | 0.01 ± 0.13 | 3.80 ± 0.09 |
| BXD69    | 36.2 ± 2.8 | 55.5 ± 3.5 | -0.45 ± 0.15 | 18.3 ± 1.8 | 11.5 ± 1.2 | 0.47 ± 0.11 | 3.60 ± 0.06 |
| BXD73    | 33.7 ± 3.1 | 60.3 ± 2.6 | -0.59 ± 0.14 | 19.3 ± 3.2 | 14.2 ± 0.6 | 0.28 ± 0.19 | 3.91 ± 0.05 |
| BXD77    | 23.8 ± 6.1 | 67.2 ± 6.8 | -1.22 ± 0.44 | 15.7 ± 3.5 | 7.4 ± 1.1  | 0.64 ± 0.16 | 3.42 ± 0.06 |
| BXD96    | 19.6 ± 1.7 | 73.1 ± 2.1 | -1.33 ± 0.12 | 10.4 ± 1.6 | 7.6 ± 0.7  | 0.28 ± 0.10 | 3.18 ± 0.03 |
| BXD98    | 10.3 ± 1.2 | 82.0 ± 2.5 | -2.11 ± 0.14 | 5.6 ± 1.6  | 5.2 ± 0.7  | 0.01 ± 0.21 | 3.64 ± 0.04 |
| BXD100   | 20.5 ± 2.0 | 74.5 ± 1.6 | -1.24 ± 0.10 | 11.0 ± 0.6 | 8.9 ± 0.5  | 0.21 ± 0.05 | 3.35 ± 0.10 |
| C57BL/6J | 32.1 ± 1.0 | 61.4 ± 1.0 | -0.65 ± 0.03 | 23.8 ± 1.6 | 8.0 ± 0.6  | 1.10 ± 0.10 | 3.53 ± 0.16 |
| DBA/2J   | 35.6 ± 2.2 | 53.9 ± 2.7 | -0.42 ± 0.09 | 31.6 ± 2.4 | 6.5 ± 0.5  | 1.58 ± 0.07 | 4.31 ± 0.08 |

Supplemental Table 2 - Transcripts included in each of the bicliques depicted in Fig. 3.

| CD3<br>(n=84) | LN T:B<br>(n=132)  | CD4<br>(n=80) | CD8<br>(n=60) | LN CD4:CD8<br>(n=30) | CD3, LN T:B<br>(n=80) | CD3, CD4<br>(n=46) |
|---------------|--------------------|---------------|---------------|----------------------|-----------------------|--------------------|
| AA388235      | AA388235           | AA388235      | ABCC5         | C1GALT1              | AA388235              | AA388235           |
| ABCC5         | ABCC5              | ABCD1         | ABCD4         | CACNB2               | ABCC5                 | ABHD12             |
| ABHD12        | ABHD12             | ABHD12        | AMPD1         | CBY1                 | ABHD12                | AYTL1              |
| AP1M1         | ANKRD40            | AI317223      | ARPC4         | CCDC44               | AP1M1                 | BAT5               |
| ARPC4         | AP1M1              | ANKRD40       | AU016693      | CST3                 | ARPC4                 | BGN                |
| AYTL1         | ARPC4              | ATP10D        | BAT1A         | D1BWG0212E           | AYTL1                 | CD79B              |
| BAT1A         | AU016693           | AYTL1         | BAT5          | D230046F09RIK        | BAT1A                 | CIAPIN1            |
| BAT5          | AYTL1              | BAT5          | C030040A15RIK | FBXO8                | BAT5                  | DDR1               |
| BGN           | BAT1A              | BGN           | CECR5         | LIP1                 | BGN                   | DNASE1L3           |
| CD79B         | BAT5               | C030014I23RIK | CNR2          | LOC100042902         | CD79B                 | ENPP1              |
| CIAPIN1       | BGN                | CD79B         | DNAHC8        | LOC100048316         | DDAH2                 | ENPP5              |
| DDAH2         | CACNG3             | CIAPIN1       | E530004K11RIK | LOC640524            | DDR1                  | ETV5               |
| DDR1          | CD79B              | DDIT3         | E530018O14RIK | NEDL2                | DNAHC8                | FHL2               |
| DNAHC8        | DDAH2              | DDR1          | FOXP4         | OLFR586              | DNASE1L3              | FUT4               |
| DNASE1L3      | DDR1               | DNASE1L3      | FUT4          | POLR2D               | ENPP1                 | GNG12              |
| ENPP1         | DGCR2              | E130306I01RIK | GABBR1        | PTPRK                | ENPP5                 | GPR116             |
| ENPP5         | DNAHC8             | EML1          | GGNBP1        | SCL0002312.1_1       | ETV5                  | H2-AA              |
| ETV5          | DNASE1L3           | ENPP1         | GPR116        | SCL0003152.1_82      | FOXP4                 | H2-AB1             |
| FHL2          | DNM2               | ENPP5         | H2-AB1        | SLIT3                | FUT4                  | H2-EA              |
| FOXP4         | ENPP1              | EPSTI1        | H2-EA         | STK32C               | GABBR1                | H2-K1              |
| FUT4          | ENPP5              | ETV5          | H2-K1         | STXBP4               | GGNBP1                | H2-OA              |
| GABBR1        | ENSMUSG00000043795 | F830021D11RIK | H2-OA         | TMEM170              | GLO1                  | H2-OB              |
| GGNBP1        | EPSTI1             | FHL2          | H2-OB         | YTHDF2               | GNG12                 | HELB               |
| GLO1          | ETV5               | FUT4          | H2-T10        | 1700095J19RIK        | GPR116                | HIC1               |
| GNG12         | EXOSC7             | GLT25D1       | HERPUD1       | 5730492I20RIK        | GZMM                  | LOC100038888       |
| GPR116        | FOXP4              | GNG12         | IGHV1S30      | 5730507A11RIK        | H2-AA                 | LOC100045158       |
| GZMM          | FSTL1              | GPR116        | INSIG1        | 6720474J12RIK        | H2-AB1                | LOC100046081       |
| H2-AA         | FUT4               | H2-AA         | LOC100046081  | A730009E18RIK        | H2-EA                 | LOC677216          |
| H2-AB1        | G430095P16RIK      | H2-AB1        | LOC100046457  | C030018P15RIK        | H2-EB2                | MANEA              |
| H2-EA         | GABBR1             | H2-EA         | LOC383196     | C130045F17RIK        | H2-K1                 | MFN1               |
| H2-EB2        | GGNBP1             | H2-K1         | LOC677216     |                      | H2-OA                 | NG23               |
| H2-K1         | GLO1               | H2-OA         | LRP1          |                      | H2-OB                 | NOTCH4             |
| H2-OA         | GLT25D1            | H2-OB         | MEN1          |                      | H2-Q7                 | PARP8              |
| H2-OB         | GNG12              | HELB          | NOTCH2        |                      | H2-T10                | PLD1               |
| H2-Q7         | GPATCH4            | HIC1          | NOTCH4        |                      | HELB                  | PPT2               |

|               |              |                 |               |               |               |
|---------------|--------------|-----------------|---------------|---------------|---------------|
| H2-T10        | GPR116       | LAD1            | OS9           | HERPUD1       | PSMB9         |
| HELB          | GZMM         | LOC100038888    | PLEKHO1       | HIC1          | RAPGEF5       |
| HERPUD1       | H2-AA        | LOC100045158    | PSEN1         | IGHV15S1      | SOD3          |
| HIC1          | H2-AB1       | LOC100046081    | PSMB9         | LOC100038888  | TMEM176A      |
| IGHV15S1      | H2-EA        | LOC100047815    | PTAFR         | LOC100042270  | TSPAN2        |
| LOC100038888  | H2-EB2       | LOC677216       | RIN2          | LOC100045158  | WDR46         |
| LOC100042270  | H2-K1        | LY6E            | SEC13         | LOC100046081  | ZBTB22        |
| LOC100045158  | H2-OA        | MANEA           | SMYD4         | LOC383196     | 2310007G05RIK |
| LOC100046081  | H2-OB        | MFN1            | SPNR          | LOC677216     | 3110070M22RIK |
| LOC383196     | H2-Q7        | MYO1C           | TRIM26        | LRP1          | 4930565O14    |
| LOC677216     | H2-T10       | NG23            | TSPAN15       | MANEA         | 5830417110RIK |
| LRP1          | HELB         | NOTCH4          | UQCRB         | MEN1          |               |
| MANEA         | HERPUD1      | PARP8           | WDR46         | MFN1          |               |
| MEN1          | HIC1         | PLD1            | ZFP101        | NEK9          |               |
| MFN1          | HTRA1        | PPT2            | ZFP41         | NG23          |               |
| NEK9          | IGH-V15      | PSMB9           | 1500031H01RIK | NOTCH4        |               |
| NG23          | IGHV15S1     | RAPGEF5         | 2900045G02RIK | PARP8         |               |
| NOTCH4        | IGHV1S56     | RARA            | 5033405K12RIK | PLD1          |               |
| OS9           | IL1A         | SCL0002050.1_27 | 5830406C17RIK | PPT2          |               |
| PARP8         | IL33         | SLCO2A1         | 5830417110RIK | PSMB9         |               |
| PLD1          | KIFC2        | SOD3            | 6430548O12RIK | PYGB          |               |
| PPT2          | LAD1         | TGFB111         | 6720418B01RIK | RAPGEF5       |               |
| PSMB9         | LHFP         | TMEM166         | 7330423F06RIK | SKIV2L        |               |
| PYGB          | LOC100038888 | TMEM176A        | 9530065M15RIK | SOD3          |               |
| RAPGEF5       | LOC100042270 | TMEM181         | A930026L03RIK | SUV420H2      |               |
| SKIV2L        | LOC100045158 | TSPAN2          |               | TMEM128       |               |
| SOD3          | LOC100046081 | TTC30B          |               | TMEM176A      |               |
| SUV420H2      | LOC100046457 | TTC7B           |               | TPST1         |               |
| SYNGR2        | LOC100047815 | WDR20A          |               | TSPAN15       |               |
| TMEM128       | LOC100048413 | WDR46           |               | TSPAN2        |               |
| TMEM176A      | LOC383196    | ZBTB22          |               | WDR46         |               |
| TPST1         | LOC640696    | ZC3H12A         |               | ZBTB22        |               |
| TSPAN15       | LOC641240    | ZFPM2           |               | ZFP101        |               |
| TSPAN2        | LOC677216    | 2310007G05RIK   |               | 1110033M05RIK |               |
| WDR46         | LRP1         | 2310061J03RIK   |               | 1500031H01RIK |               |
| ZBTB22        | MANEA        | 2610020H08RIK   |               | 2310007G05RIK |               |
| ZFP101        | MARCKSL1     | 2610208M17RIK   |               | 3110070M22RIK |               |
| 1110033M05RIK | MEN1         | 3110070M22RIK   |               | 4930565O14    |               |
| 1500031H01RIK | MFN1         | 4930565O14      |               | 5033405K12RIK |               |
| 2310007G05RIK | MS4A7        | 4931428F04RIK   |               | 5830417110RIK |               |
| 3110070M22RIK | NAIP2        | 5430432H19RIK   |               | 6430548O12RIK |               |

4930565O14  
5033405K12RIK  
5830417I10RIK  
6430548O12RIK  
9130017C17RIK  
9430046I01RIK  
A930015D03RIK  
A930030J18RIK

NEK9  
NG23  
NKIRAS2  
NOTCH4  
NRF1  
PARP8  
PDPK1  
PLD1  
PPT2  
PQLC3  
PSMB9  
PYGB  
RAPGEF5  
RASA4  
SH3BGRL  
SH3BGRL2  
SKIV2L  
SLC25A10  
SLC35E1  
SMYD4  
SOD3  
SRPRB  
STAC2  
SUV420H2  
TBC1D14  
TMEM115  
TMEM128  
TMEM176A  
TPST1  
TRAF3IP2  
TSPAN15  
TSPAN2  
TTC30B  
WDR46  
ZBTB22  
ZFP101  
ZFP639  
1110033M05RIK  
1500031H01RIK  
2310007G05RIK  
2700033K02RIK

5830417I10RIK  
9629553\_3256\_RC  
A830007P12RIK  
A930006D11RIK

9130017C17RIK  
9430046I01RIK  
A930015D03RIK  
A930030J18RIK



|                 |  |  |  |  |
|-----------------|--|--|--|--|
| 2810439F02RIK   |  |  |  |  |
| 3110070M22RIK   |  |  |  |  |
| 4930565O14      |  |  |  |  |
| 5033405K12RIK   |  |  |  |  |
| 5830417I10RIK   |  |  |  |  |
| 5830428M24RIK   |  |  |  |  |
| 6430548O12RIK   |  |  |  |  |
| 9130017C17RIK   |  |  |  |  |
| 9230114J08RIK   |  |  |  |  |
| 9430008C03RIK   |  |  |  |  |
| 9430046I01RIK   |  |  |  |  |
| 9629553_3256_RC |  |  |  |  |
| A230062G08RIK   |  |  |  |  |
| A930015D03RIK   |  |  |  |  |
| A930030J18RIK   |  |  |  |  |

| CD3, CD8<br>(n=32) | LN T:B, CD4<br>(n=51) | LN T:B, CD8<br>(n=34) | CD3, CD4,<br>LN T:B<br>(n=44) | CD3, CD4, CD8,<br>LN T:B<br>(n=14) | CD3, CD8,<br>LN T:B<br>(n=31) |
|--------------------|-----------------------|-----------------------|-------------------------------|------------------------------------|-------------------------------|
| ABCC5              | AA388235              | ABCC5                 | AA388235                      | BAT5                               | ABCC5                         |
| ARPC4              | ABHD12                | ARPC4                 | ABHD12                        | FUT4                               | ARPC4                         |
| BAT1A              | ANKRD40               | AU016693              | AYTL1                         | GPR116                             | BAT1A                         |
| BAT5               | AYTL1                 | BAT1A                 | BAT5                          | H2-AB1                             | BAT5                          |
| DNAHC8             | BAT5                  | BAT5                  | BGN                           | H2-EA                              | DNAHC8                        |
| FOXP4              | BGN                   | DNAHC8                | CD79B                         | H2-K1                              | FOXP4                         |
| FUT4               | CD79B                 | FOXP4                 | DDR1                          | H2-OA                              | FUT4                          |
| GABBR1             | DDR1                  | FUT4                  | DNASE1L3                      | H2-OB                              | GABBR1                        |
| GGNBP1             | DNASE1L3              | GABBR1                | ENPP1                         | LOC100046081                       | GGNBP1                        |
| GPR116             | ENPP1                 | GGNBP1                | ENPP5                         | LOC677216                          | GPR116                        |
| H2-AB1             | ENPP5                 | GPR116                | ETV5                          | NOTCH4                             | H2-AB1                        |
| H2-EA              | EPSTI1                | H2-AB1                | FUT4                          | PSMB9                              | H2-EA                         |
| H2-K1              | ETV5                  | H2-EA                 | GNG12                         | WDR46                              | H2-K1                         |
| H2-OA              | FUT4                  | H2-K1                 | GPR116                        | 5830417110RIK                      | H2-OA                         |
| H2-OB              | GLT25D1               | H2-OA                 | H2-AA                         |                                    | H2-OB                         |
| H2-T10             | GNG12                 | H2-OB                 | H2-AB1                        |                                    | H2-T10                        |
| HERPUD1            | GPR116                | H2-T10                | H2-EA                         |                                    | HERPUD1                       |
| LOC100046081       | H2-AA                 | HERPUD1               | H2-K1                         |                                    | LOC100046081                  |
| LOC383196          | H2-AB1                | LOC100046081          | H2-OA                         |                                    | LOC383196                     |
| LOC677216          | H2-EA                 | LOC100046457          | H2-OB                         |                                    | LOC677216                     |
| LRP1               | H2-K1                 | LOC383196             | HELB                          |                                    | LRP1                          |
| MEN1               | H2-OA                 | LOC677216             | HIC1                          |                                    | MEN1                          |
| NOTCH4             | H2-OB                 | LRP1                  | LOC100038888                  |                                    | NOTCH4                        |
| OS9                | HELB                  | MEN1                  | LOC100045158                  |                                    | PSMB9                         |
| PSMB9              | HIC1                  | NOTCH4                | LOC100046081                  |                                    | TSPAN15                       |
| TSPAN15            | LAD1                  | PSMB9                 | LOC677216                     |                                    | WDR46                         |
| WDR46              | LOC100038888          | SMYD4                 | MANEA                         |                                    | ZFP101                        |
| ZFP101             | LOC100045158          | TSPAN15               | MFN1                          |                                    | 1500031H01RIK                 |
| 1500031H01RIK      | LOC100046081          | WDR46                 | NG23                          |                                    | 5033405K12RIK                 |
| 5033405K12RIK      | LOC100047815          | ZFP101                | NOTCH4                        |                                    | 5830417110RIK                 |
| 5830417110RIK      | LOC677216             | 1500031H01RIK         | PARP8                         |                                    | 6430548O12RIK                 |
| 6430548O12RIK      | MANEA                 | 5033405K12RIK         | PLD1                          |                                    |                               |
|                    | MFN1                  | 5830417110RIK         | PPT2                          |                                    |                               |
|                    | NG23                  | 6430548O12RIK         | PSMB9                         |                                    |                               |
|                    | NOTCH4                |                       | RAPGEF5                       |                                    |                               |

PARP8  
PLD1  
PPT2  
PSMB9  
RAPGEF5  
SOD3  
TMEM176A  
TSPAN2  
TTC30B  
WDR46  
ZBTB22  
2310007G05RIK  
3110070M22RIK  
4930565O14  
5830417110RIK  
9629553\_3256\_RC

SOD3  
TMEM176A  
TSPAN2  
WDR46  
ZBTB22  
2310007G05RIK  
3110070M22RIK  
4930565O14  
5830417110RIK

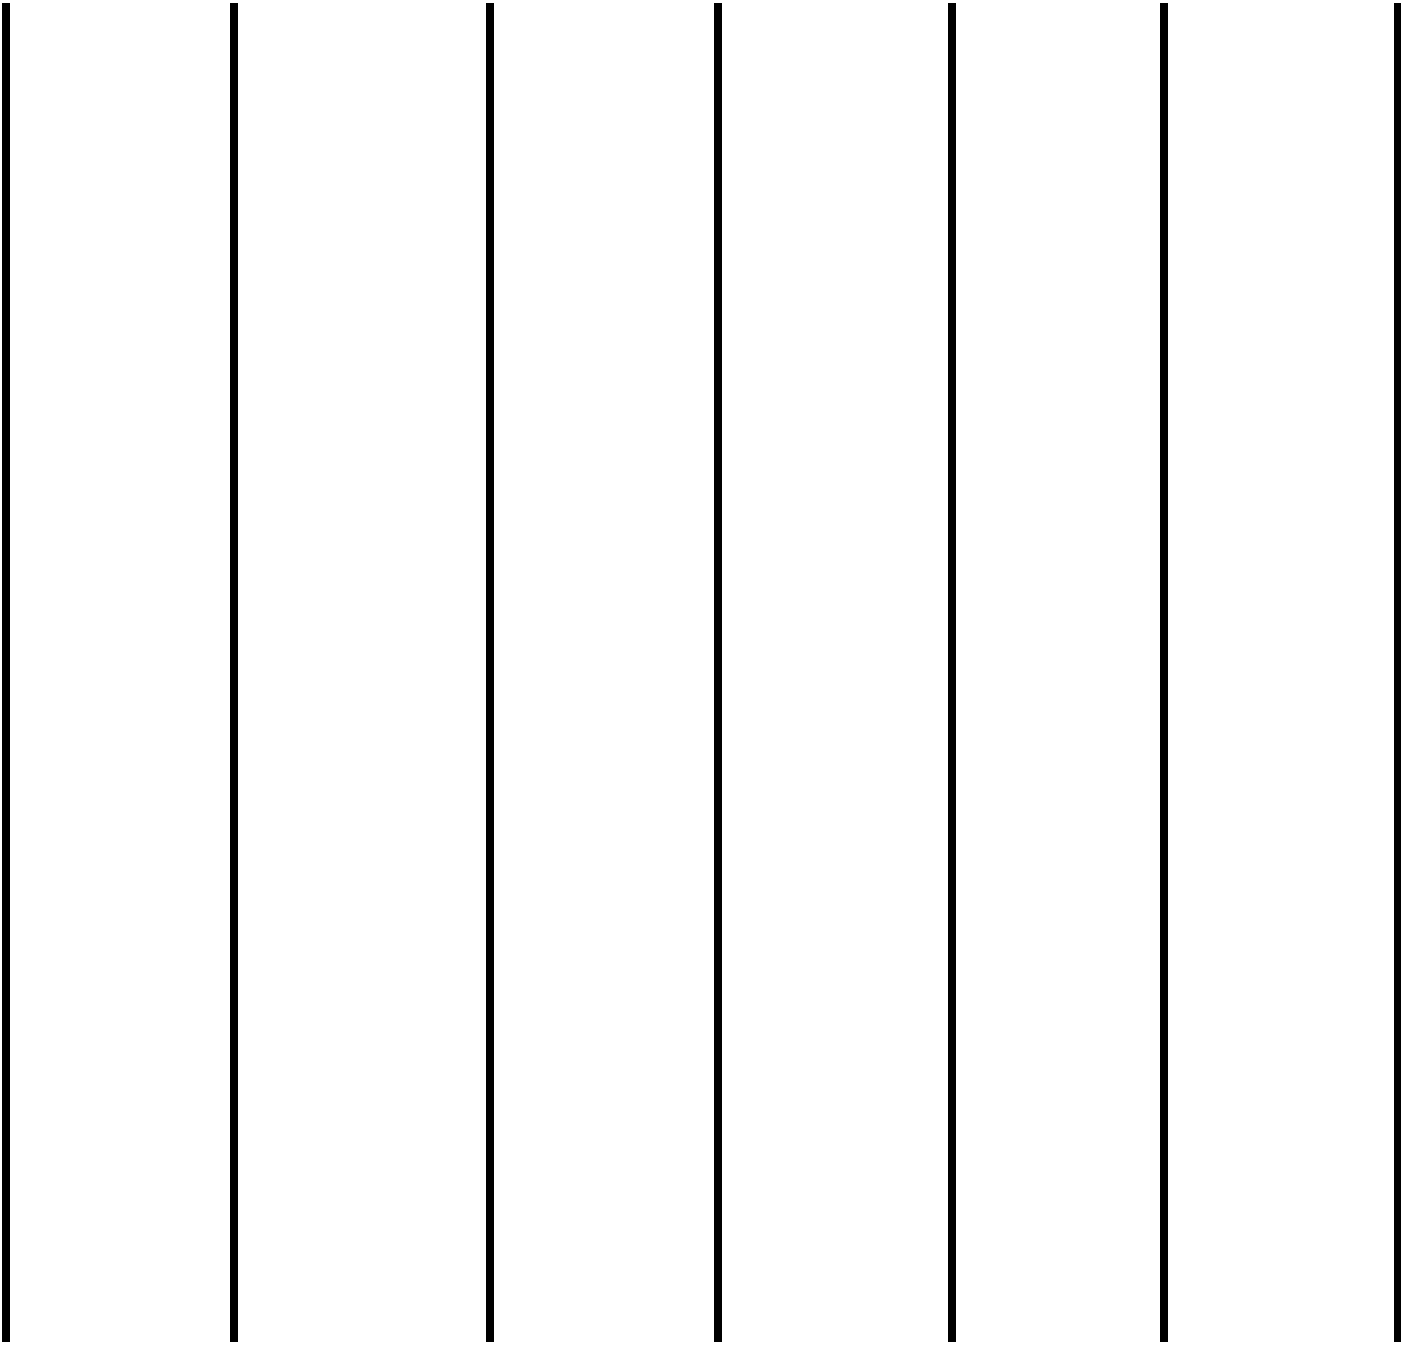

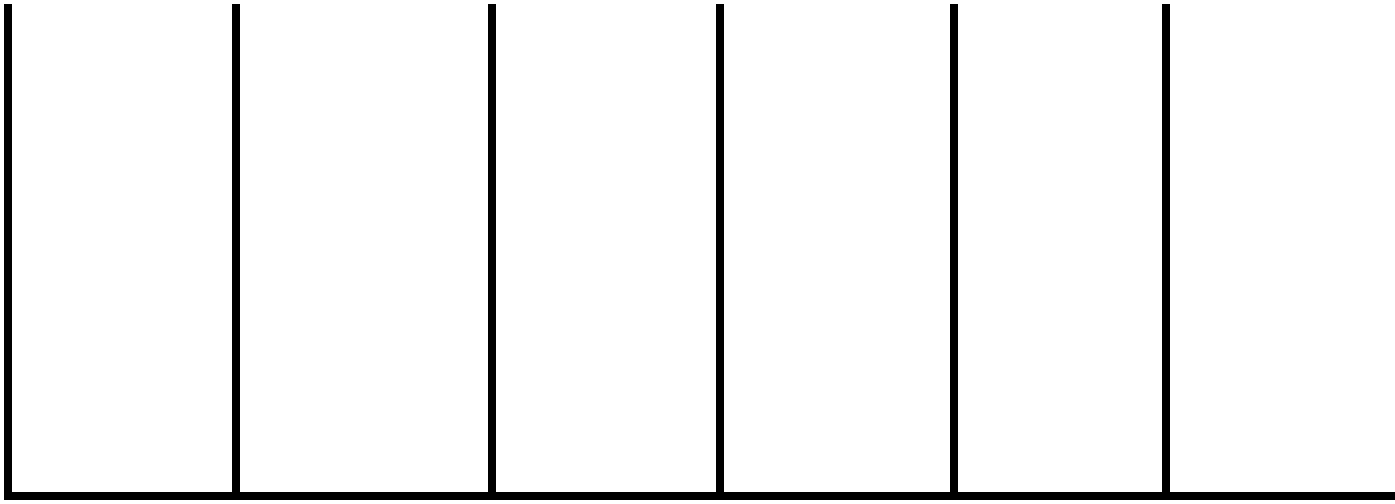

Fig. S1. Genome-wide scans for peripheral blood immunophenotypes of 41 BXD strains: MHCII density as measured by the LN of the median fluorescence of MHCII on MHCII<sup>+</sup> lymphocytes (A), T:B ratio as measured by the LN of the ratio of %CD3 to %CD79 lymphocytes (B), CD4:CD8 as measured by the LN of the ratio of %CD4 to %CD8 lymphocytes (C). Solid horizontal lines represent genome-wide significance at  $P < 0.05$ , and the dashed lines represent  $P < 0.63$ , based on 1,000 permutations. LOD indicates logarithm of odds scores.

Fig. S2. Spleen transcriptome map based on 38 BXD strains. The horizontal axis represents the genomic locations of the SNP markers/ QTL locations in Mb (chromosomes are in alternating colors), and the vertical axis represents the genomic location of each transcript in Mb. Each data point represents the maximum eQTL for each of the 1,881 transcripts that had a permuted  $p$ -value  $< 0.05$ .

Table S1. Data shown as mean  $\pm$  SEM of 5 to 9 mice per strain.

Table S2. N = the number of transcripts in the maximal biclique for each of the immunophenotypes. The transcript names correspond to the "Symbol" descriptions in the Illumina Bead Studio annotation file.
